# Supplementary material for: DNA preference of indenoisoquinolines: a computational approach
Source: Royal Society of Chemistry journal article supplement (doi:10.1039/d3ob00162h), 2023-01-01
Supplement: d3ob00162h1.pdf [file d3ob00162h1.pdf]

## Supporting Information

*for*

# DNA Preference of Indenoisoquinolines: A Computational Approach

*Semiha Kevser Bali,<sup>1,2\*</sup> Zeynep Pinar Haslak,<sup>1,3</sup> Gulsah Cifci,<sup>1</sup> Viktorya Aviyente<sup>1</sup>*

<sup>1</sup> Bogazici University, Department of Chemistry, 34342, Istanbul, Turkey

<sup>2</sup> Michigan State University, Department of Chemistry, East Lansing, Michigan, 48824, USA

<sup>3</sup> Université de Reims Champagne-Ardenne, Reims, 51687, France

[\\*balisem1@msu.edu](mailto:*balisem1@msu.edu), [semihakevserbali@gmail.com](mailto:semihakevserbali@gmail.com)

### List of Tables

|                                                                                                                                                                                                                      |    |
|----------------------------------------------------------------------------------------------------------------------------------------------------------------------------------------------------------------------|----|
| <b>Table S1.</b> The docking score of top 10 poses for L77 compound. $E_{\text{int}}$ values are calculated using the single point QM/MM method after the minimization of the docked systems. ....                   | 3  |
| <b>Table S2.</b> The atom types and partial charges of L77. ....                                                                                                                                                     | 4  |
| <b>Table S3.</b> The atom types and partial charges of CPT. ....                                                                                                                                                     | 6  |
| <b>Table S4.</b> The atom types and partial charges of PTR residue. ....                                                                                                                                             | 8  |
| <b>Table S5.</b> The average hydrogen bond percentages in each of the systems simulated. Res.1 and Res.2 correspond to the acceptor and donor atoms, respectively. W, M1, M2, and M4 are the systems simulated. .... | 9  |
| <b>Table S6.</b> The time-series plots for the distances calculated between the indicated residue-ligand atom pairs for CPT simulations. The running average values are calculated for every 100 frames. ....        | 11 |
| <b>Table S7.</b> Average values of distances reported in Figure 8 for the last 100 ns of the simulations of L77 compound. The naming of the columns follows the ResID@Atom nomenclature. ....                        | 12 |
| <b>Table S8.</b> Average values of distances reported in Table S6 for the last 100 ns of the simulations of CPT compound. The naming of the columns follows the ResID@Atom nomenclature. ....                        | 12 |
| <b>Table S9.</b> Average values of distances reported in Table S10-S12 for the last 100 ns of the simulations. ....                                                                                                  | 12 |
| <b>Table S10.</b> The center of mass distances between the hinge residues and the inhibitor compounds. All heavy atoms were considered for the residues and the ligand molecules. ....                               | 13 |
| <b>Table S11.</b> The center of mass distances between the hinge residues and the inhibitor compounds. All heavy atoms were considered for the residues and the ligand molecules. ....                               | 14 |
| <b>Table S12.</b> The center of mass distances between the catalytic tetrad residues and the inhibitor compounds. All heavy atoms were considered for the residues and the ligand molecules. ....                    | 15 |

## List of Figures

|                                                                                                                                                                                                                                                                                                                                                                                                            |    |
|------------------------------------------------------------------------------------------------------------------------------------------------------------------------------------------------------------------------------------------------------------------------------------------------------------------------------------------------------------------------------------------------------------|----|
| <b>Figure S1.</b> The docking poses of L77: Pose 1 (purple), Pose 5 (yellow), and pose 6 (cyan). The nearby residues (<math><5\text{\AA}</math>) are shown as well. The DNA backbone is colored in pink, hTopoIB backbone is colored in green. PTR: phosphorylated tyrosine residue. The figure is obtained using Chimera. ....                                                                            | 16 |
| <b>Figure S2.</b> The RMSD plots of duplicate L77 simulations. <b>a.</b> M1; <b>b.</b> M2; <b>c.</b> M3; <b>d.</b> W. RMSD Fit plots were calculated by fitting the trajectories to the heated complex structures. DNA/TopoIB binary complex (green), DNA/TopoIB without the linker domain (red), and the L77 (blue) are shown.....                                                                        | 17 |
| <b>Figure S3.</b> The RMSD plots of duplicate CPT simulations. <b>a.</b> M1; <b>b.</b> M2; <b>c.</b> M3; <b>d.</b> W. RMSD Fit plots were calculated by fitting the trajectories to the heated complex structures. DNA/TopoIB binary complex (green), DNA/TopoIB without the linker domain (red), and the CPT (blue) are shown.....                                                                        | 18 |
| <b>Figure S4.</b> Different orientations of L77 were observed in M1 simulations. <b>a.</b> The beginning of the simulation; <b>b.</b> at 170 ns; <b>c.</b> at 300 ns. The DNA backbone is shown in green ribbon. The surrounding residues as well as the stacking DNA bases are shown with stick representation. The L77 compound is shown in purple. ....                                                 | 19 |
| <b>Figure S5.</b> Different orientations of L77 were observed in M2 simulations. <b>a.</b> The beginning of the simulation side view; <b>b.</b> top view; <b>c.</b> side view at 100 ns; <b>d.</b> top view at 100ns. The DNA backbone is shown in green ribbon. The surrounding residues as well as the stacking DNA bases are shown with stick representation. The L77 compound is shown in purple. .... | 20 |
| <b>Figure S6.</b> Different orientations of L77 were observed in M3 simulations. <b>a.</b> The beginning of the simulation side view; <b>b.</b> top view; <b>c.</b> side view at 300 ns; <b>d.</b> top view at 300ns. The DNA backbone is shown in green ribbon. The surrounding residues as well as the stacking DNA bases are shown with stick representation. The L77 compound is shown in purple. .... | 21 |
| <b>Figure S7.</b> Different orientations of L77 were observed in W simulations. <b>a.</b> The beginning of the simulation side view; <b>b.</b> top view; <b>c.</b> side view at 100 ns; <b>d.</b> top view at 100ns. The DNA backbone is shown in green ribbon. The surrounding residues as well as the stacking DNA bases are shown with stick representation. The L77 compound is shown in purple. ....  | 22 |
| <b>Figure S8.</b> Different orientations of CPT were observed in M1 simulations. <b>a.</b> The beginning of the simulation side view; <b>b.</b> top view; <b>c.</b> side view at 300 ns; <b>d.</b> top view at 300ns. The DNA backbone is shown in green ribbon. The surrounding residues as well as the stacking DNA bases are shown with stick representation. The CPT compound is shown in cyan.....    | 23 |
| <b>Figure S9.</b> Different orientations of CPT were observed in M2 simulations. <b>a.</b> The beginning of the simulation side view; <b>b.</b> top view; <b>c.</b> side view at 300 ns; <b>d.</b> top view at 300ns. The DNA backbone is shown in green ribbon. The surrounding residues as well as the stacking DNA bases are shown with stick representation. The CPT compound is shown in cyan.....    | 24 |
| <b>Figure S10.</b> Different orientations of CPT were observed in M3 simulations. <b>a.</b> The beginning of the simulation side view; <b>b.</b> top view; <b>c.</b> side view at 300 ns; <b>d.</b> top view at 300ns. The DNA backbone is shown in green ribbon. The surrounding residues as well as the stacking DNA bases are shown with stick representation. The CPT compound is shown in cyan.....   | 25 |
| <b>Figure S11.</b> Different orientations of CPT were observed in W simulations. <b>a.</b> The beginning of the simulation side view; <b>b.</b> top view; <b>c.</b> side view at 300 ns; <b>d.</b> top view at 300ns. The DNA backbone is shown in green ribbon. The surrounding residues as well as the stacking DNA bases are shown with stick representation. The CPT compound is shown in cyan.....    | 26 |
| <b>Figure S12.</b> The RMSF plots of L77 (red) and CPT (blue) duplicate simulations for <b>a.</b> M1, <b>b.</b> M2, <b>c.</b> M3, and <b>d.</b> W simulations. N-terminal domain, core domain, linker domain, and C-terminal domain correspond to residues 1-214 (not shown here), 215-635, 636-712, and 713-765, respectively. The DNA bases start from 766-809, and 810 is the inhibitor compound. ....  | 27 |
| <b>Figure S13.</b> The main dynamics obtained from Principal component analysis (PCA) of L77 simulations. The color scale from red to white to blue indicates the low mobility to high mobility.....                                                                                                                                                                                                       | 28 |
| <b>Figure S14.</b> The main dynamics obtained from Principal component analysis (PCA) of CPT simulations. The color scale from red to white to blue indicates the low mobility to high mobility.....                                                                                                                                                                                                       | 29 |

**Figure S15.** The dynamic cross-correlation analysis of L77 simulations. From low correlation to high correlation, the residue pairs are colored from blue to red, respectively.....30

**Figure S16.** Dynamic cross-correlation analysis of CPT simulations. From low correlation to high correlation, the residue pairs are colored from blue to red, respectively. ....31

**Table S1.** The docking score of top 10 poses for L77 compound.  $E_{\text{int}}$  values are calculated using the single point QM/MM method after the minimization of the docked systems.

| <b>Pose</b> | <b>Docking Score</b> | <b><math>\Delta E_{\text{int}}</math> (kcal/mol)</b> |
|-------------|----------------------|------------------------------------------------------|
| <b>1</b>    | -10.90               | -120.95                                              |
| <b>2</b>    | -10.85               | -105.06                                              |
| <b>3</b>    | -10.56               | -96.17                                               |
| <b>4</b>    | -10.56               | -100.73                                              |
| <b>5</b>    | -10.41               | -119.00                                              |
| <b>6</b>    | -10.37               | -121.28                                              |
| <b>7</b>    | -10.28               | -108.28                                              |
| <b>8</b>    | -10.26               | -98.54                                               |
| <b>9</b>    | -10.18               | -114.04                                              |
| <b>10</b>   | -10.03               | -84.95                                               |

**Table S2.** The atom types and partial charges of L77.

| <b>Atom Name</b> | <b>Atom Type</b> | <b>Seq.</b> | <b>Element</b> | <b>Partial Charge</b> |
|------------------|------------------|-------------|----------------|-----------------------|
| C1               | ca               | 1           | 6              | -0.1597               |
| H1               | ha               | 2           | 1              | 0.1346                |
| C2               | ca               | 3           | 6              | -0.1985               |
| H2               | ha               | 4           | 1              | 0.1486                |
| C3               | ca               | 5           | 6              | -0.1533               |
| C4               | ca               | 6           | 6              | 0.2511                |
| C5               | ca               | 7           | 6              | 0.2263                |
| C6               | ca               | 8           | 6              | -0.0866               |
| O1               | os               | 9           | 8              | -0.3223               |
| C7               | c3               | 10          | 6              | -0.0129               |
| H3               | h1               | 11          | 1              | 0.0784                |
| H4               | h1               | 12          | 1              | 0.0784                |
| H5               | h1               | 13          | 1              | 0.0784                |
| O2               | os               | 14          | 8              | -0.3325               |
| C8               | c3               | 15          | 6              | -0.0015               |
| H6               | h1               | 16          | 1              | 0.074                 |
| H7               | h1               | 17          | 1              | 0.074                 |
| H8               | h1               | 18          | 1              | 0.074                 |
| C9               | cc               | 19          | 6              | -0.0627               |
| C10              | cd               | 20          | 6              | 0.0187                |
| C11              | c                | 21          | 6              | 0.4937                |
| O3               | o                | 22          | 8              | -0.5471               |
| N1               | n                | 23          | 7              | -0.0294               |
| C12              | c                | 24          | 6              | 0.6005                |
| O4               | o                | 25          | 8              | -0.5005               |
| C13              | ca               | 26          | 6              | -0.2027               |
| C14              | ca               | 27          | 6              | 0.0221                |
| C15              | ca               | 28          | 6              | -0.2429               |
| H9               | ha               | 29          | 1              | 0.2045                |
| C16              | ca               | 30          | 6              | 0.3394                |
| C17              | ca               | 31          | 6              | 0.2758                |
| C18              | ca               | 32          | 6              | -0.3184               |
| H10              | ha               | 33          | 1              | 0.2385                |
| O5               | os               | 34          | 8              | -0.4211               |
| O                | os               | 35          | 8              | -0.4113               |
| C19              | c3               | 36          | 6              | 0.2853                |
| H11              | h2               | 37          | 1              | 0.0911                |
| H12              | h2               | 38          | 1              | 0.0911                |

|     |    |    |   |         |
|-----|----|----|---|---------|
| C20 | c3 | 39 | 6 | -0.0403 |
| H13 | h1 | 40 | 1 | 0.0652  |
| H14 | h1 | 41 | 1 | 0.0652  |
| C21 | c3 | 42 | 6 | 0.0112  |
| H15 | hc | 43 | 1 | 0.0409  |
| H16 | hc | 44 | 1 | 0.0409  |
| C22 | c3 | 45 | 6 | -0.0452 |
| H17 | h1 | 46 | 1 | 0.06    |
| H18 | h1 | 47 | 1 | 0.06    |
| N2  | na | 48 | 7 | 0.0456  |
| C23 | cc | 49 | 6 | 0.1777  |
| H19 | h5 | 50 | 1 | 0.1269  |
| C24 | cc | 51 | 6 | -0.3666 |
| H20 | h4 | 52 | 1 | 0.2009  |
| C   | cd | 53 | 6 | 0.1117  |
| H   | h4 | 54 | 1 | 0.1252  |
| N   | nd | 55 | 7 | -0.5544 |

**Table S3.** The atom types and partial charges of CPT.

| <b>Atom Name</b> | <b>Atom Type</b> | <b>Seq.</b> | <b>Element</b> | <b>Partial Charge</b> |
|------------------|------------------|-------------|----------------|-----------------------|
| C1               | ca               | 1           | 6              | -0.1524               |
| H1               | ha               | 2           | 1              | 0.1518                |
| C2               | ca               | 3           | 6              | -0.1306               |
| H2               | ha               | 4           | 1              | 0.1534                |
| C3               | ca               | 5           | 6              | -0.2332               |
| H3               | ha               | 6           | 1              | 0.1541                |
| C4               | ca               | 7           | 6              | 0.4162                |
| C5               | ca               | 8           | 6              | 0.0218                |
| C6               | ca               | 9           | 6              | -0.1915               |
| H4               | ha               | 10          | 1              | 0.1488                |
| N1               | nb               | 11          | 7              | -0.5578               |
| C7               | ca               | 12          | 6              | 0.3962                |
| C8               | ca               | 13          | 6              | -0.0478               |
| C9               | ca               | 14          | 6              | -0.2346               |
| H5               | ha               | 15          | 1              | 0.1927                |
| C10              | c3               | 16          | 6              | -0.0274               |
| H6               | h1               | 17          | 1              | 0.1035                |
| H7               | h1               | 18          | 1              | 0.1035                |
| N                | n                | 19          | 7              | -0.0338               |
| C11              | cc               | 20          | 6              | -0.0534               |
| C12              | cd               | 21          | 6              | -0.1801               |
| H8               | ha               | 22          | 1              | 0.1654                |
| C13              | cd               | 23          | 6              | -0.0298               |
| C14              | cc               | 24          | 6              | -0.0421               |
| C15              | c                | 25          | 6              | 0.4443                |
| O1               | o                | 26          | 8              | -0.5972               |
| C16              | c3               | 27          | 6              | 0.0808                |
| H9               | h1               | 28          | 1              | 0.0982                |
| H10              | h1               | 29          | 1              | 0.0982                |
| C17              | c3               | 30          | 6              | 0.1748                |
| O2               | oh               | 31          | 8              | -0.5883               |
| H11              | ho               | 32          | 1              | 0.4082                |
| O3               | os               | 33          | 8              | -0.4269               |
| C18              | c                | 34          | 6              | 0.7264                |
| O                | o                | 35          | 8              | -0.5679               |
| C19              | c3               | 36          | 6              | 0.0341                |
| H12              | hc               | 37          | 1              | 0.0085                |
| H13              | hc               | 38          | 1              | 0.0085                |

|     |    |    |   |         |
|-----|----|----|---|---------|
| C   | c3 | 39 | 6 | -0.0822 |
| H14 | hc | 40 | 1 | 0.0292  |
| H15 | hc | 41 | 1 | 0.0292  |
| H   | hc | 42 | 1 | 0.0292  |



**Table S4.** The atom types and partial charges of PTR residue.

| <b>Atom Name</b> | <b>Atom Type</b> | <b>Seq.</b> | <b>Element</b> | <b>Partial Charges</b> |
|------------------|------------------|-------------|----------------|------------------------|
| N                | N                | 1           | 7              | -0.42745               |
| H                | H                | 2           | 1              | 0.28402                |
| CA               | CX               | 3           | 6              | -0.00332               |
| HA               | H1               | 4           | 1              | 0.111848               |
| CB               | CT               | 5           | 6              | -0.06529               |
| HB2              | HC               | 6           | 1              | 0.045463               |
| HB3              | HC               | 7           | 1              | 0.045463               |
| CG               | CA               | 8           | 6              | 0.006319               |
| CD1              | CA               | 9           | 6              | -0.21337               |
| HD1              | HA               | 10          | 1              | 0.136129               |
| CE1              | CA               | 11          | 6              | -0.20822               |
| HE1              | HA               | 12          | 1              | 0.149042               |
| CZ               | CA               | 13          | 6              | 0.420808               |
| OP               | OS               | 14          | 8              | -0.50491               |
| P                | P                | 15          | 15             | 1.208364               |
| O1P              | O2               | 16          | 8              | -0.75422               |
| O2P              | O2               | 17          | 8              | -0.75422               |
| CE2              | CA               | 18          | 6              | -0.20822               |
| HE2              | HA               | 19          | 1              | 0.149042               |
| CD2              | CA               | 20          | 6              | -0.21337               |
| HD2              | HA               | 21          | 1              | 0.136129               |
| C                | C                | 22          | 6              | 0.498833               |
| O                | O                | 23          | 8              | -0.53098               |

**Table S5.** The average hydrogen bond percentages in each of the systems simulated. Res.1 and Res.2 correspond to the acceptor and donor atoms, respectively. W, M1, M2, and M4 are the systems simulated.

|            | <b>Res.1(A)</b> | <b>Res.2(D)</b> | <b>W</b> | <b>M1</b> | <b>M2</b> | <b>M4</b> |
|------------|-----------------|-----------------|----------|-----------|-----------|-----------|
|            | CPT@O           | K532@NZ         | 11%      | 25%       | 26%       | 0%        |
|            | CPT@O2          | K532@NZ         | 17.5%    | 0%        | 0%        | 0%        |
|            | 575@O2          | CPT@O2          | 28.5%    | 0%        | 0%        | 0%        |
| <b>CPT</b> | CPT@O1          | 576@O5'         | 36%      | 0%        | 49.5%     | 82.5%     |
|            | CPT@O3          | 576@O5'         | 0%       | 0%        | 0%        | 0%        |
|            | CPT@N1          | R364@NH1        | 1%       | 0%        | 8%        | 1.5%      |
|            | CPT@O           | R488@NH2        | 0%       | 0%        | 4%        | 0%        |
|            | CPT@O2          | 600@N2          | 0%       | 0%        | 0%        | 7.5%      |
|            | D533@OD2        | CPT@O2          | 24%      | 0%        | 36.5%     | 79%       |
|            | L77             | L77@O4          | R364@NH1 | 17.5%     | 16%       | 23%       |
|            | L77@O1          | 576@O5'         | 1%       | 17%       | 26.5%     | 25%       |
|            | L77@O2          | 576@O5'         | 35%      | 40.5%     | 42.5%     | 20%       |

**Table S6.** The time-series plots for the distances calculated between the indicated residue-ligand atom pairs for CPT simulations. The running average values are calculated for every 100 frames.

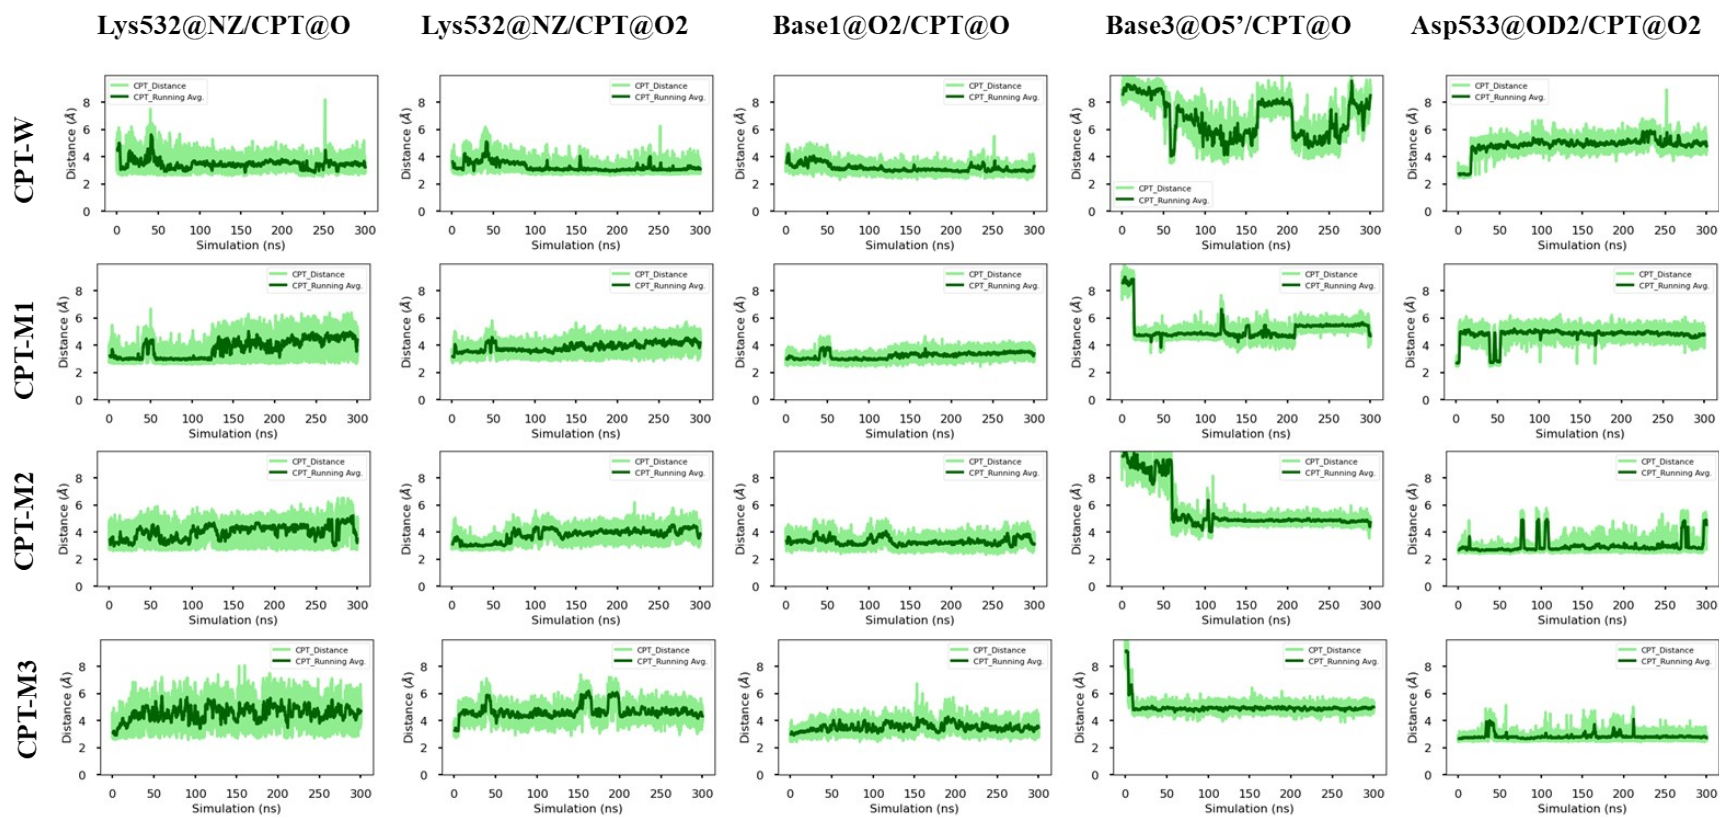

**Table S7.** Average values of distances reported in Figure 8 for the last 100 ns of the simulations of L77 compound. The naming of the columns follows the ResID@Atom nomenclature.

|               | <b>Arg364@NH1/L77@O4</b> | <b>Base3@O5'/L77@O1</b> | <b>Base3@O5'/L77@O2</b> |
|---------------|--------------------------|-------------------------|-------------------------|
| <b>L77-W</b>  | 2.93 ± 0.16              | 3.51 ± 0.34             | 2.91 ± 0.24             |
| <b>L77-M1</b> | 2.99 ± 0.24              | 5.23 ± 1.77             | 4.94 ± 1.98             |
| <b>L77-M2</b> | 2.92 ± 0.17              | 3.43 ± 0.47             | 2.93 ± 0.37             |
| <b>L77-M3</b> | 2.91 ± 0.16              | 3.64 ± 0.56             | 3.04 ± 0.33             |

**Table S8.** Average values of distances reported in Table S6 for the last 100 ns of the simulations of CPT compound. The naming of the columns follows the ResID@Atom nomenclature.

|               | <b>Lys532@NZ/CPT@O</b> | <b>Lys532@NZ/CPT@O2</b> | <b>Base1@O2/CPT@O</b> | <b>Base3@O5'/CPT@O</b> | <b>Asp533@OD2/CPT@O2</b> |
|---------------|------------------------|-------------------------|-----------------------|------------------------|--------------------------|
| <b>CPT-W</b>  | 3.46 ± 0.53            | 3.25 ± 0.43             | 3.16 ± 0.36           | 6.79 ± 1.51            | 4.85 ± 0.63              |
| <b>CPT-M1</b> | 3.78 ± 0.85            | 3.86 ± 0.46             | 3.28 ± 0.31           | 5.17 ± 0.88            | 4.76 ± 0.55              |
| <b>CPT-M2</b> | 4.0 ± 0.72             | 3.78 ± 0.53             | 3.30 ± 0.38           | 5.65 ± 1.67            | 2.95 ± 0.56              |
| <b>CPT-M3</b> | 4.53 ± 0.80            | 4.66 ± 0.60             | 3.49 ± 0.40           | 4.95 ± 0.52            | 2.82 ± 0.30              |

**Table S9.** Average values of distances reported in Table S10-S12 for the last 100 ns of the simulations.

|               | <b>Arg488</b> | <b>Lys532</b> | <b>Arg590</b> | <b>His632</b> | <b>Met428</b> | <b>Leu429</b> | <b>Asn430</b> | <b>Pro431</b> | <b>Ser432</b> |
|---------------|---------------|---------------|---------------|---------------|---------------|---------------|---------------|---------------|---------------|
| <b>CPT-W</b>  | 13.89 ± 0.45  | 10.01 ± 0.37  | 16.54 ± 0.35  | 14.32 ± 1.27  | 12.54 ± 0.55  | 15.51 ± 0.46  | 14.58 ± 0.55  | 13.11 ± 0.57  | 17.43 ± 0.54  |
| <b>CPT-M1</b> | 13.76 ± 0.61  | 9.68 ± 0.51   | 16.76 ± 0.88  | 13.28 ± 1.11  | 12.17 ± 0.54  | 15.33 ± 0.58  | 14.55 ± 0.65  | 13.04 ± 0.56  | 17.34 ± 0.56  |
| <b>CPT-M2</b> | 12.82 ± 0.66  | 8.61 ± 0.51   | 15.89 ± 0.74  | 12.05 ± 1.06  | 13.58 ± 0.79  | 16.35 ± 0.83  | 14.68 ± 0.91  | 13.49 ± 0.85  | 17.74 ± 0.91  |
| <b>CPT-M3</b> | 13.46 ± 0.43  | 8.70 ± 0.31   | 15.76 ± 0.37  | 11.67 ± 0.31  | 13.20 ± 0.62  | 16.82 ± 0.61  | 16.02 ± 0.71  | 14.31 ± 0.61  | 18.66 ± 0.63  |
| <b>L77-W</b>  | 17.14 ± 0.44  | 12.25 ± 0.27  | 18.41 ± 0.43  | 16.81 ± 0.43  | 9.79 ± 0.60   | 12.87 ± 0.60  | 12.52 ± 0.68  | 11.60 ± 0.73  | 15.81 ± 0.71  |
| <b>L77-M1</b> | 16.52 ± 0.66  | 12.87 ± 0.80  | 19.16 ± 0.74  | 16.46 ± 0.75  | 9.33 ± 0.53   | 13.08 ± 0.45  | 11.95 ± 0.67  | 14.31 ± 0.53  | 15.30 ± 0.60  |
| <b>L77-M2</b> | 16.87 ± 0.50  | 12.28 ± 0.35  | 18.63 ± 0.58  | 15.82 ± 0.40  | 9.52 ± 0.36   | 13.02 ± 0.55  | 12.29 ± 0.62  | 11.48 ± 0.57  | 15.61 ± 0.56  |
| <b>L77-M3</b> | 16.12 ± 0.37  | 12.00 ± 0.26  | 18.72 ± 0.45  | 16.10 ± 0.47  | 9.28 ± 0.46   | 13.29 ± 0.43  | 12.65 ± 0.42  | 12.05 ± 0.44  | 16.11 ± 0.40  |

**Table S10.** The center of mass distances between the hinge residues and the inhibitor compounds. All heavy atoms were considered for the residues and the ligand molecules.

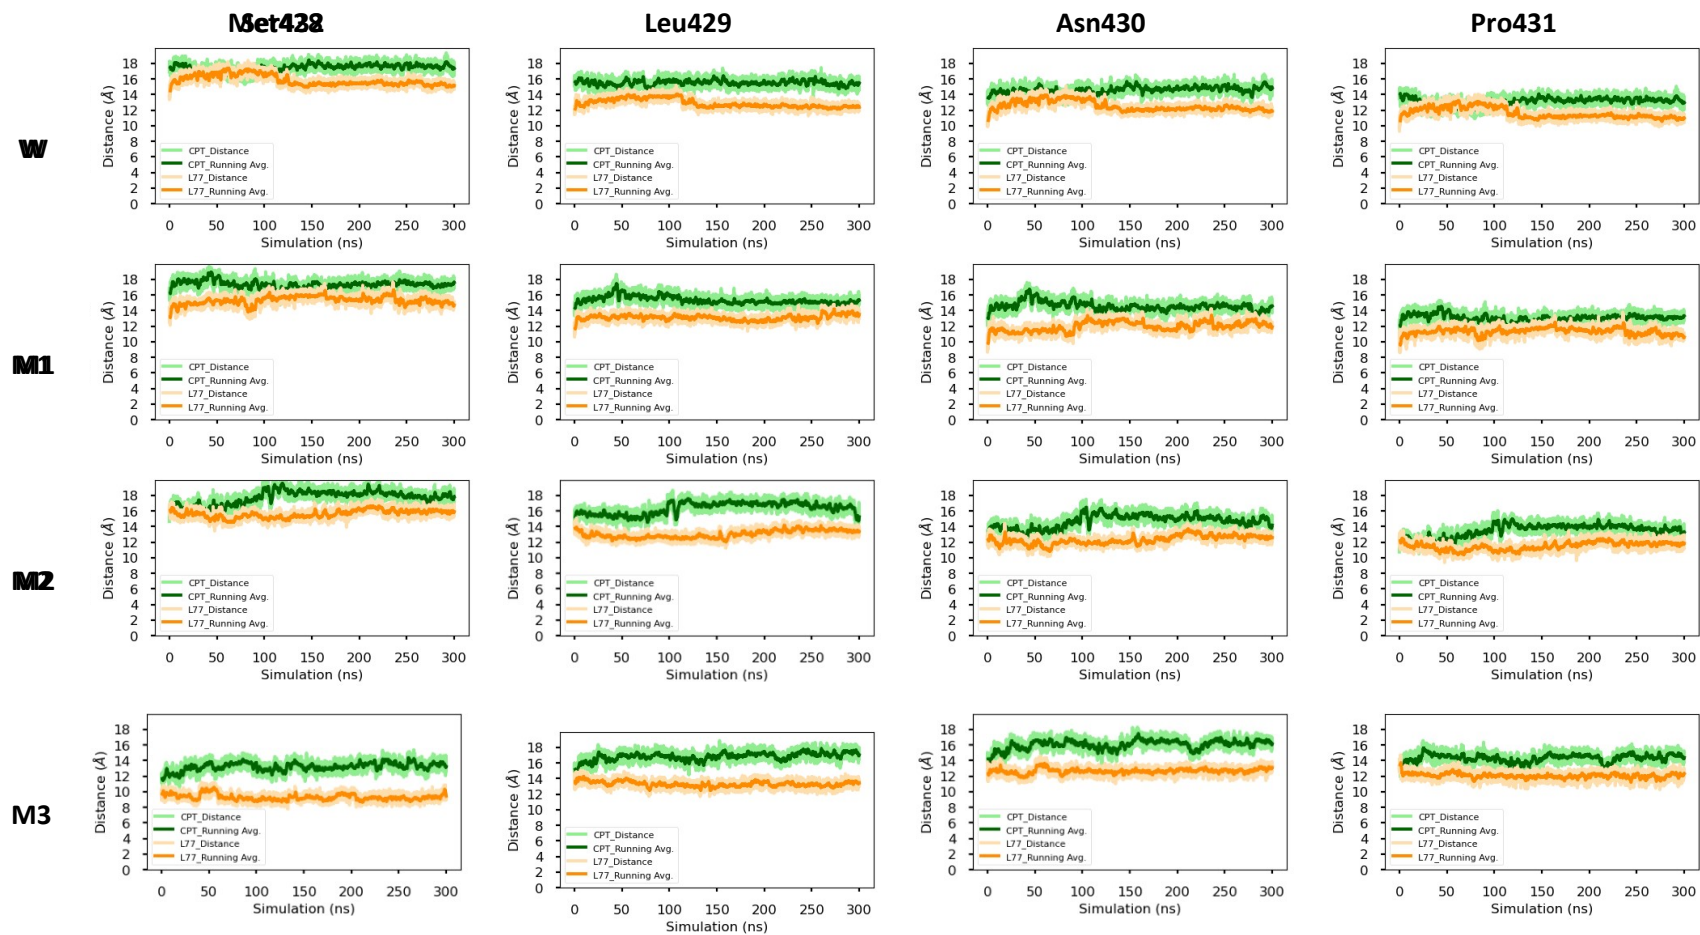

M3

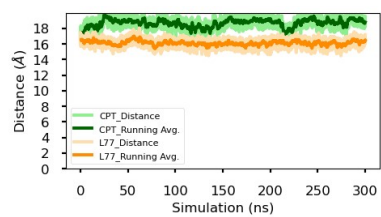

**Table S11.** The center of mass distances between the hinge residues and the inhibitor compounds. All heavy atoms were considered for the residues and the ligand molecules.

**Table S12.** The center of mass distances between the catalytic tetrad residues and the inhibitor compounds. All heavy atoms were considered for the residues and the ligand molecules.

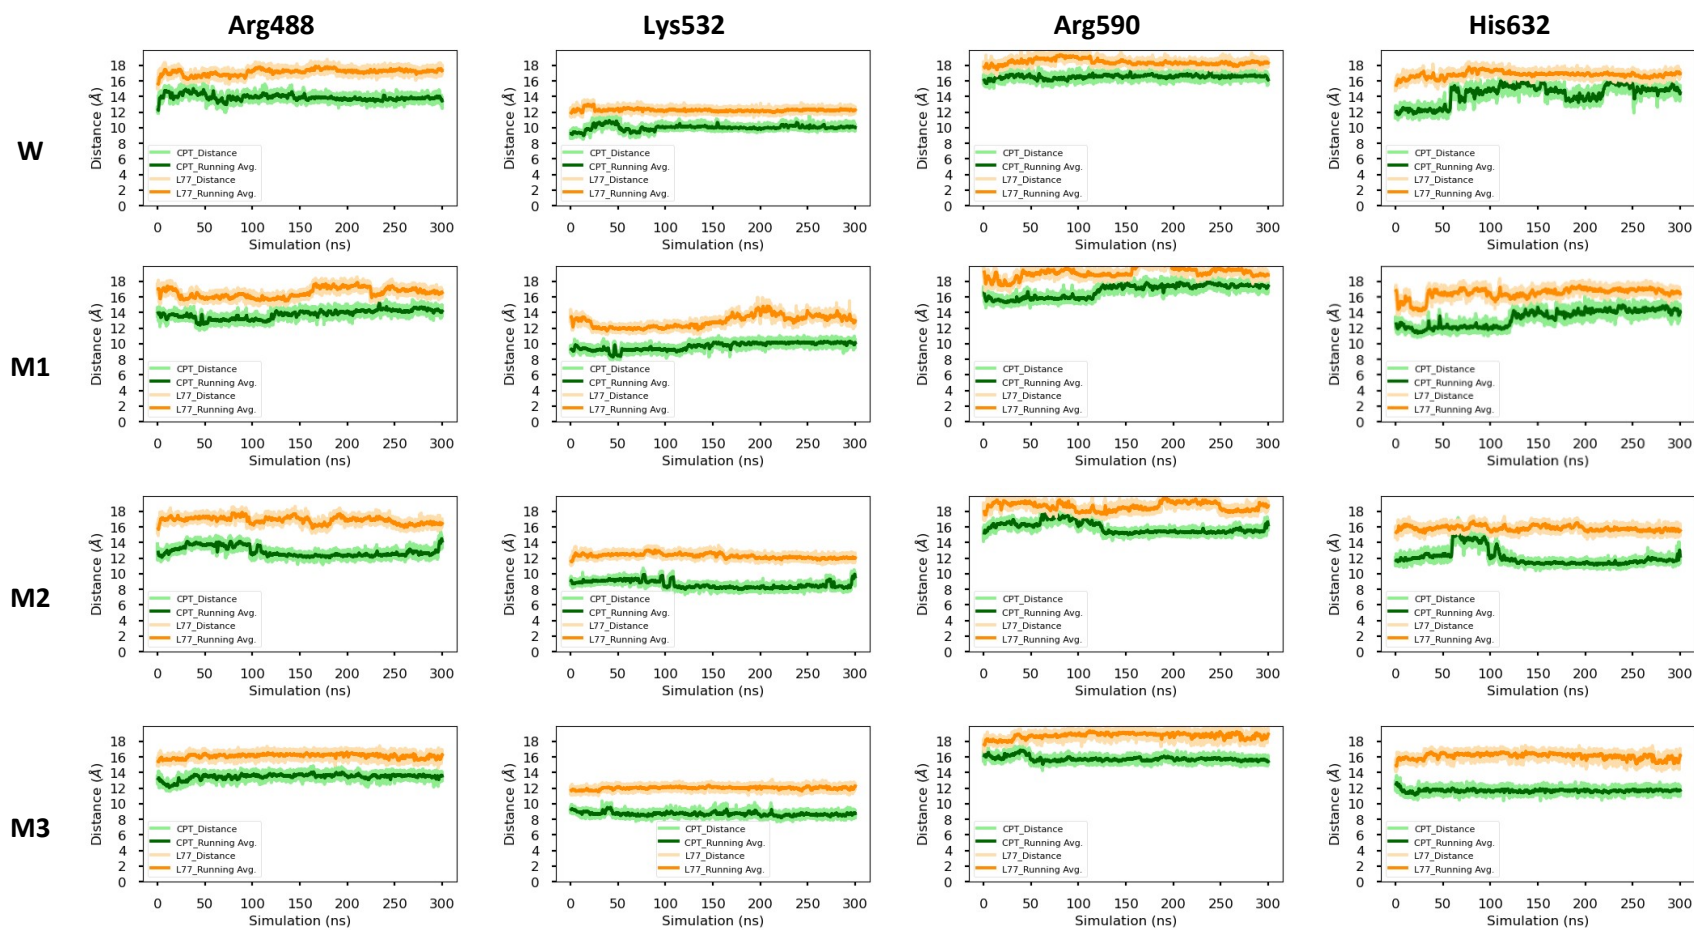

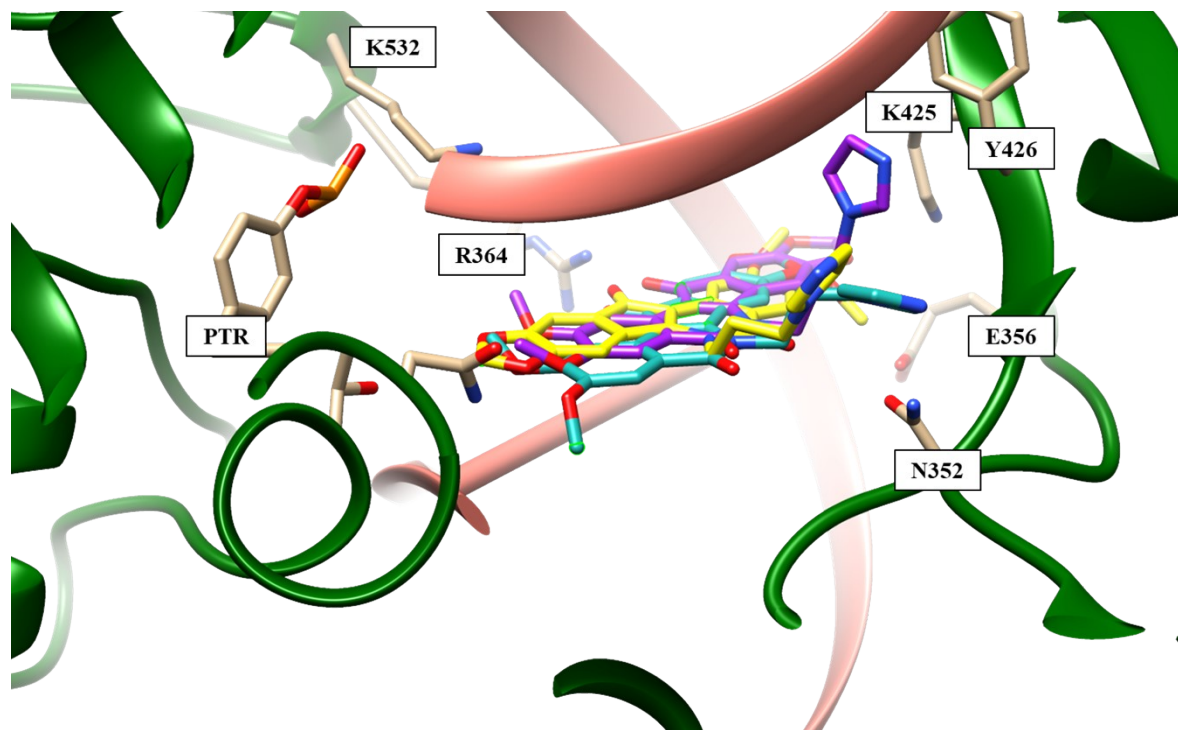

**Figure S1.** The docking poses of L77: Pose 1 (purple), Pose 5 (yellow), and pose 6 (cyan). The nearby residues ( $<5\text{\AA}$ ) are shown as well. The DNA backbone is colored in pink, hTopoIB backbone is colored in green. PTR: phosphorylated tyrosine residue. The figure is obtained using Chimera.



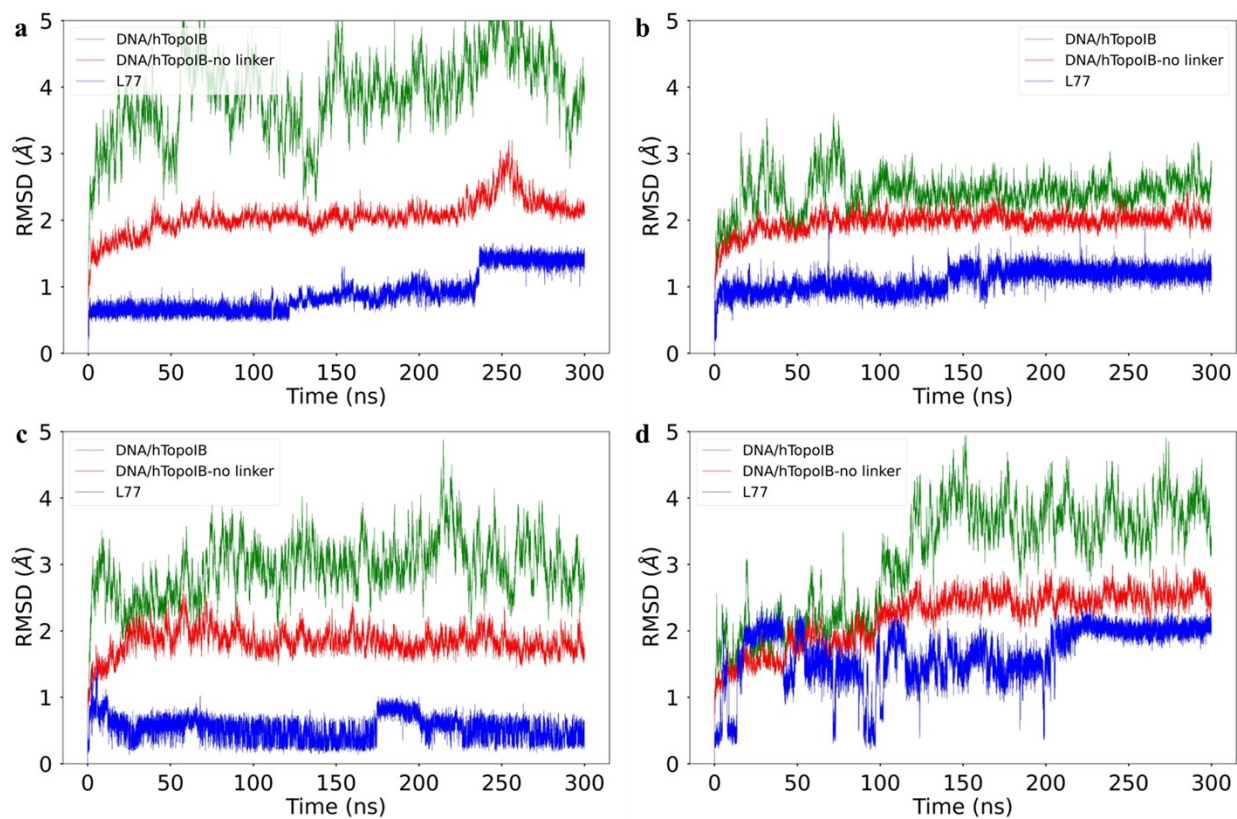

**Figure S2.** The RMSD plots of duplicate L77 simulations. **a.** M1; **b.** M2; **c.** M3; **d.** W. RMSD Fit plots were calculated by fitting the trajectories to the heated complex structures. DNA/TopoIB binary complex (green), DNA/TopoIB without the linker domain (red), and the L77 (blue) are shown.

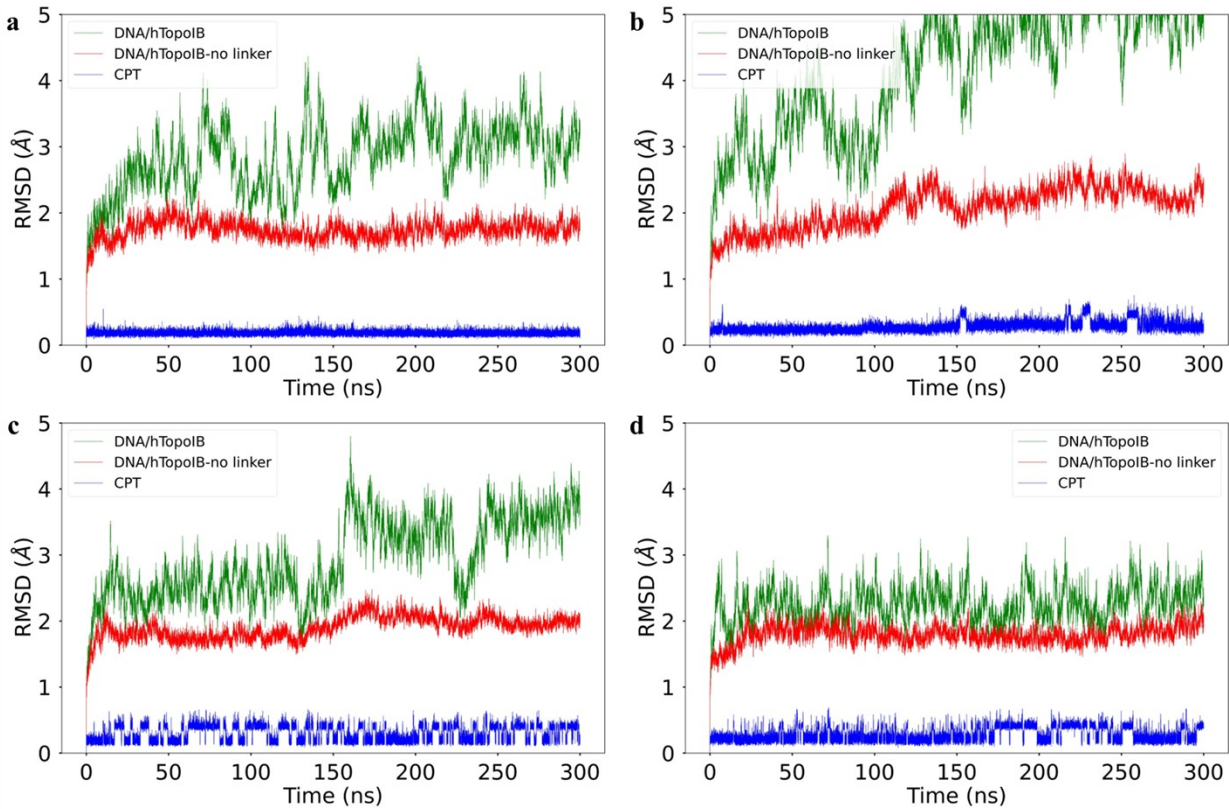

**Figure S3.** The RMSD plots of duplicate CPT simulations. **a.** M1; **b.** M2; **c.** M3; **d.** W. RMSD Fit plots were calculated by fitting the trajectories to the heated complex structures. DNA/TopoIB binary complex (green), DNA/TopoIB without the linker domain (red), and the CPT (blue) are shown.

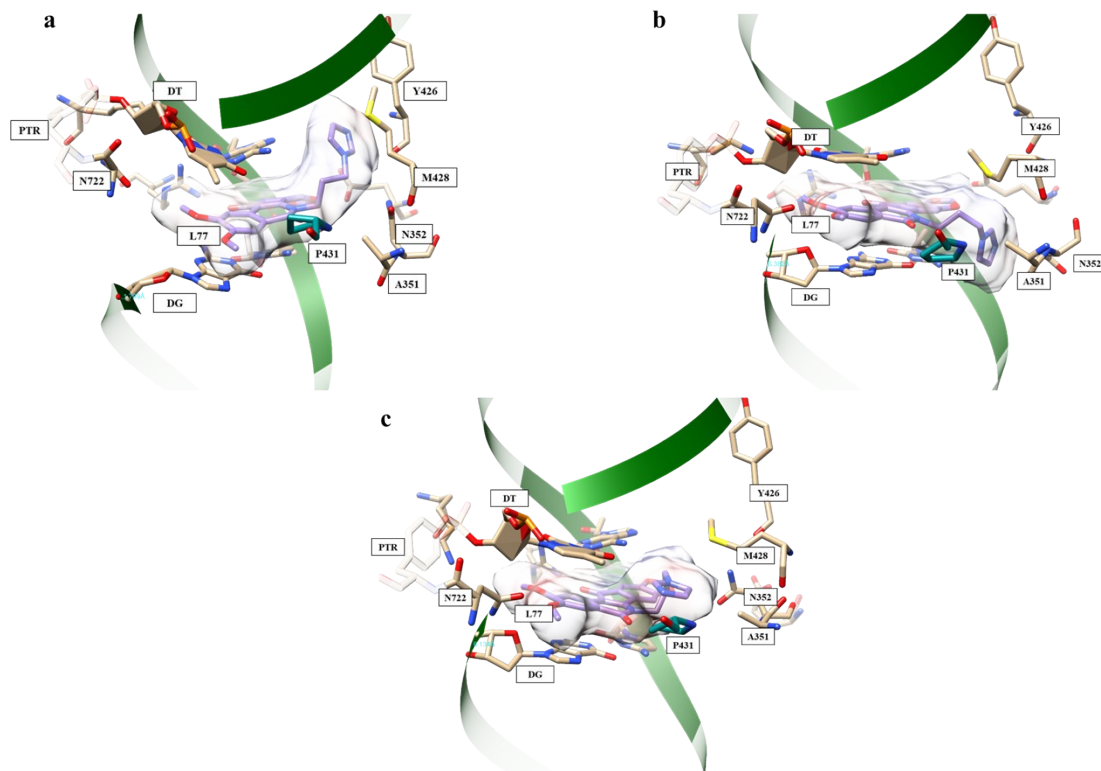

**Figure S4.** Different orientations of L77 were observed in M1 simulations. **a.** The beginning of the simulation; **b.** at 170 ns; **c.** at 300 ns. The DNA backbone is shown in green ribbon. The surrounding residues as well as the stacking DNA bases are shown with stick representation. The L77 compound is shown in purple.

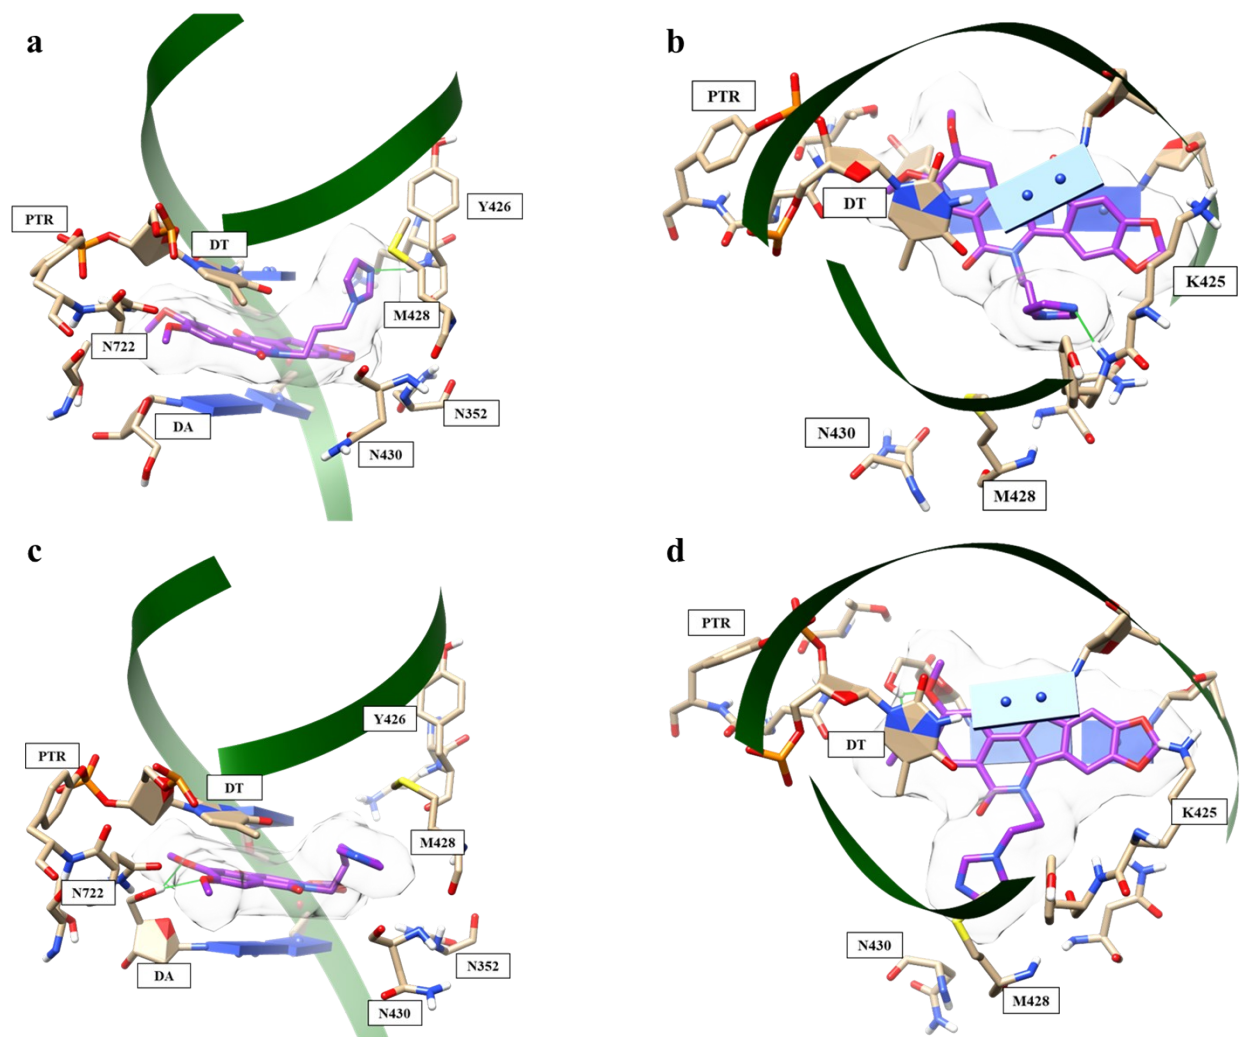

**Figure S5.** Different orientations of L77 were observed in M2 simulations. **a.** The beginning of the simulation side view; **b.** top view; **c.** side view at 100 ns; **d.** top view at 100ns. The DNA backbone is shown in green ribbon. The surrounding residues as well as the stacking DNA bases are shown with stick representation. The L77 compound is shown in purple.

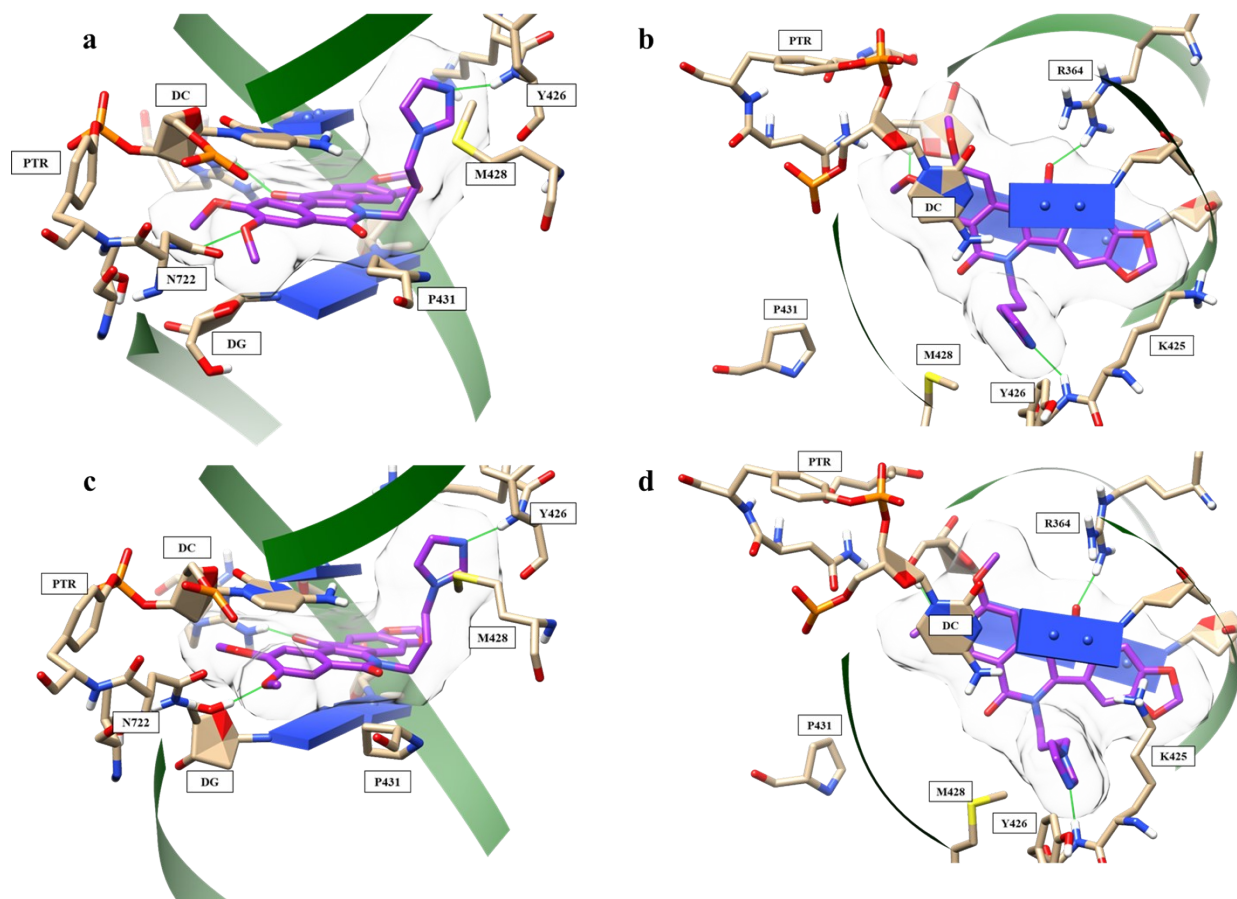

**Figure S6.** Different orientations of L77 were observed in M3 simulations. **a.** The beginning of the simulation side view; **b.** top view; **c.** side view at 300 ns; **d.** top view at 300ns. The DNA backbone is shown in green ribbon. The surrounding residues as well as the stacking DNA bases are shown with stick representation. The L77 compound is shown in purple.

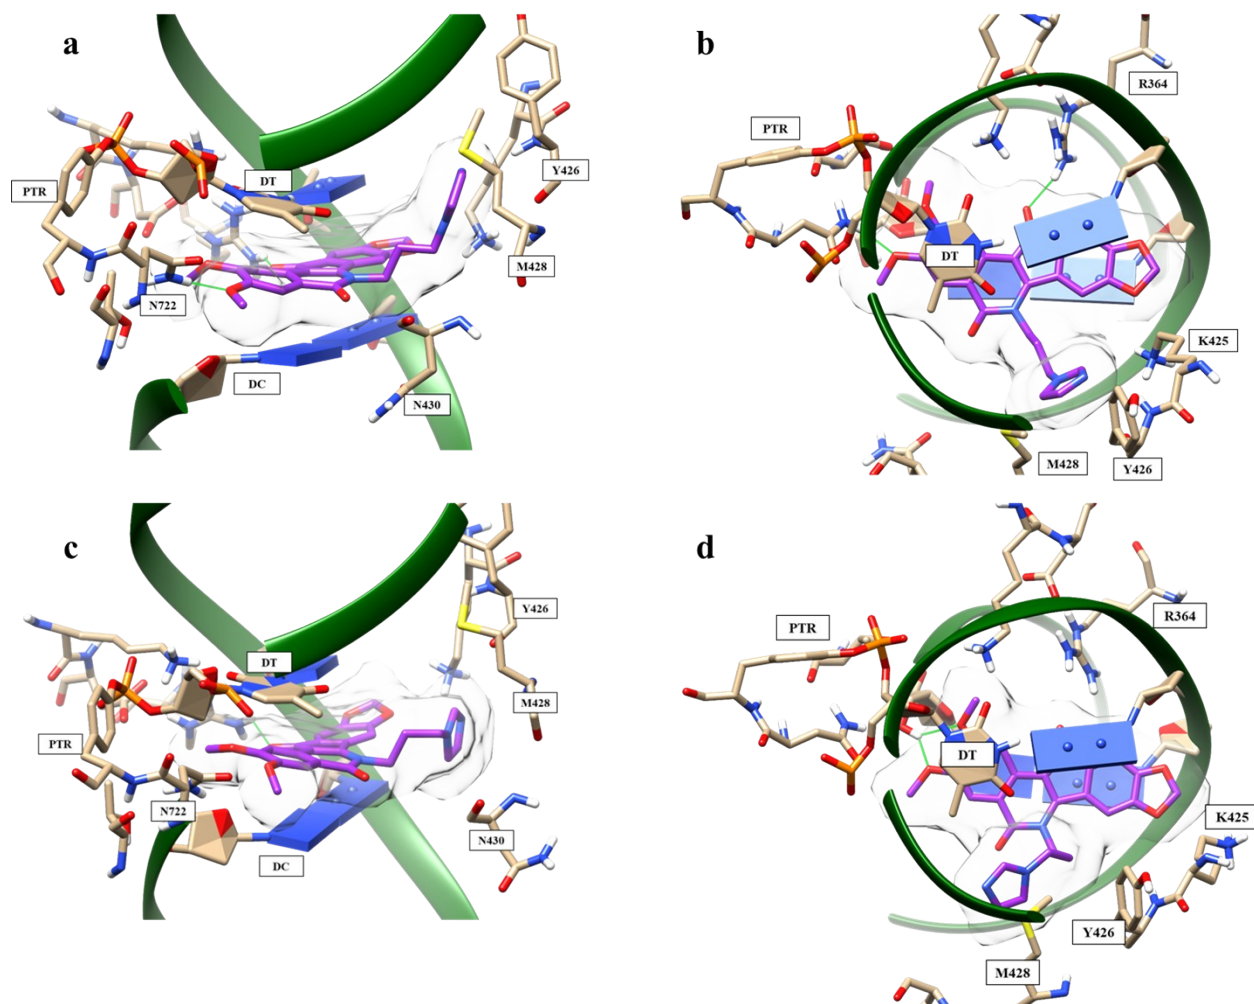

**Figure S7.** Different orientations of L77 were observed in W simulations. **a.** The beginning of the simulation side view; **b.** top view; **c.** side view at 100 ns; **d.** top view at 100ns. The DNA backbone is shown in green ribbon. The surrounding residues as well as the stacking DNA bases are shown with stick representation. The L77 compound is shown in purple.

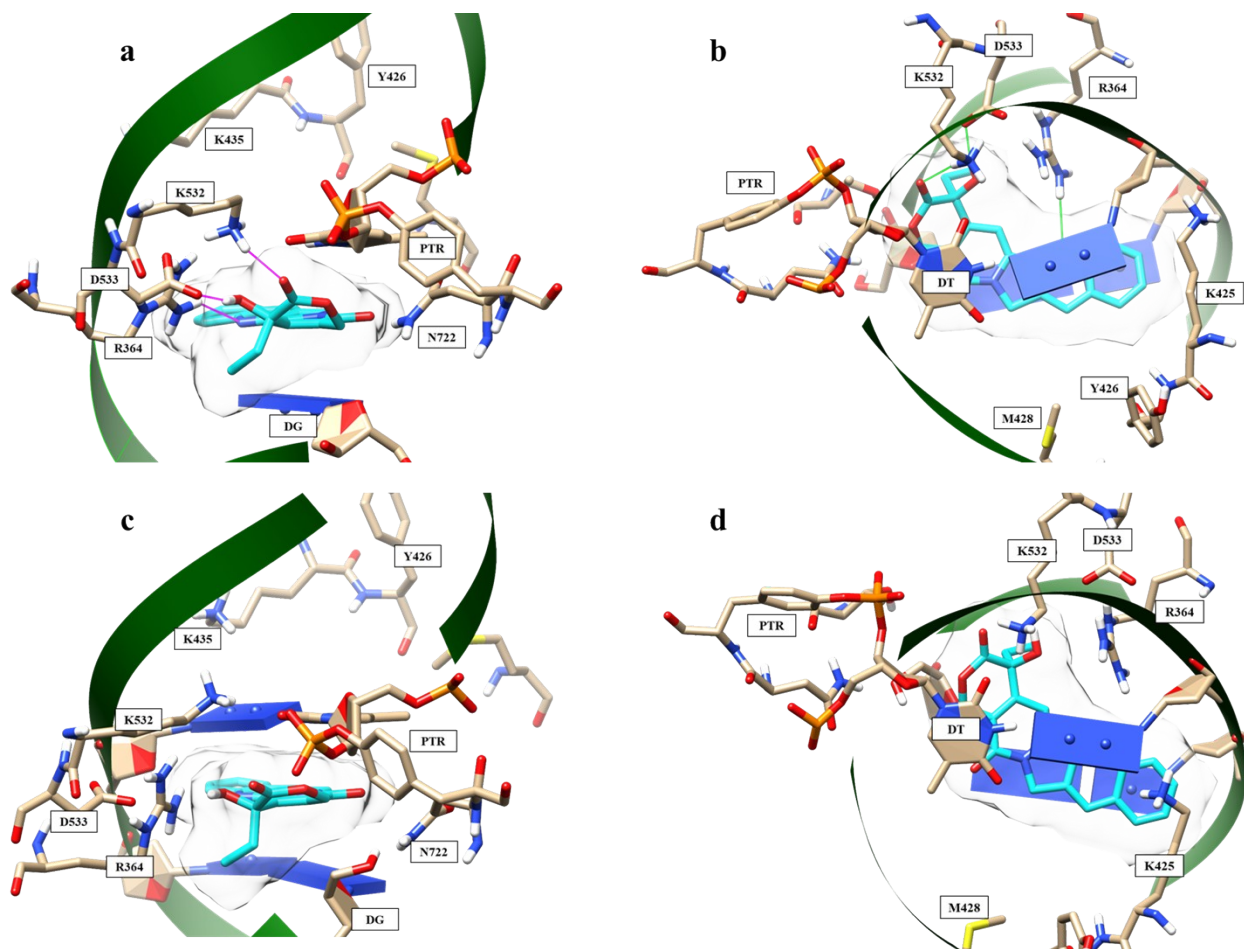

**Figure S8.** Different orientations of CPT were observed in M1 simulations. **a.** The beginning of the simulation side view; **b.** top view; **c.** side view at 300 ns; **d.** top view at 300ns. The DNA backbone is shown in green ribbon. The surrounding residues as well as the stacking DNA bases are shown with stick representation. The CPT compound is shown in cyan.

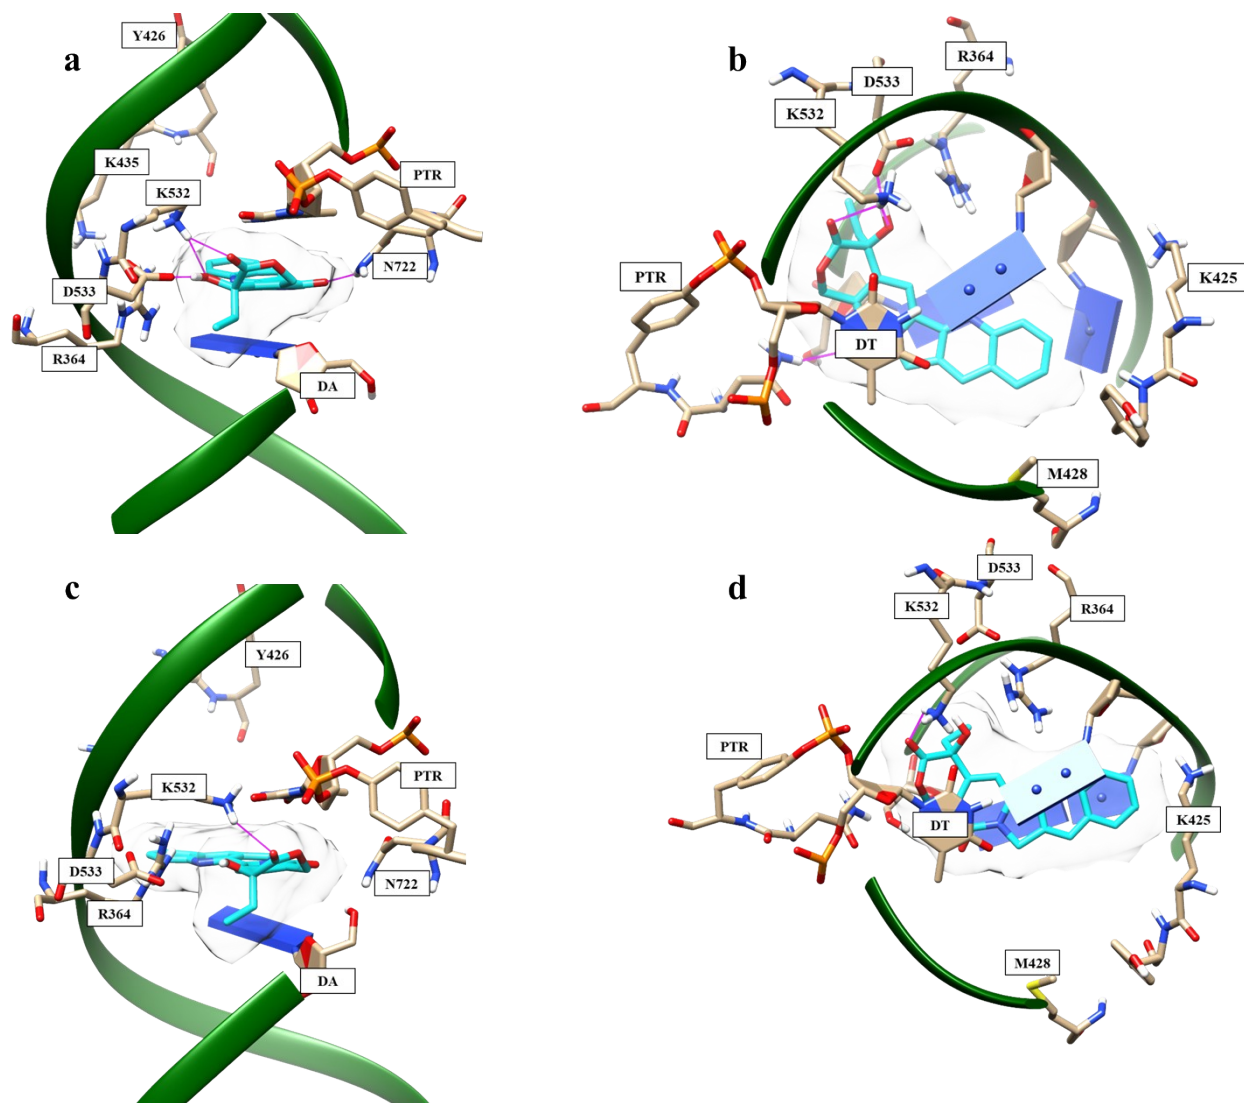

**Figure S9.** Different orientations of CPT were observed in M2 simulations. **a.** The beginning of the simulation side view; **b.** top view; **c.** side view at 300 ns; **d.** top view at 300ns. The DNA backbone is shown in green ribbon. The surrounding residues as well as the stacking DNA bases are shown with stick representation. The CPT compound is shown in cyan.



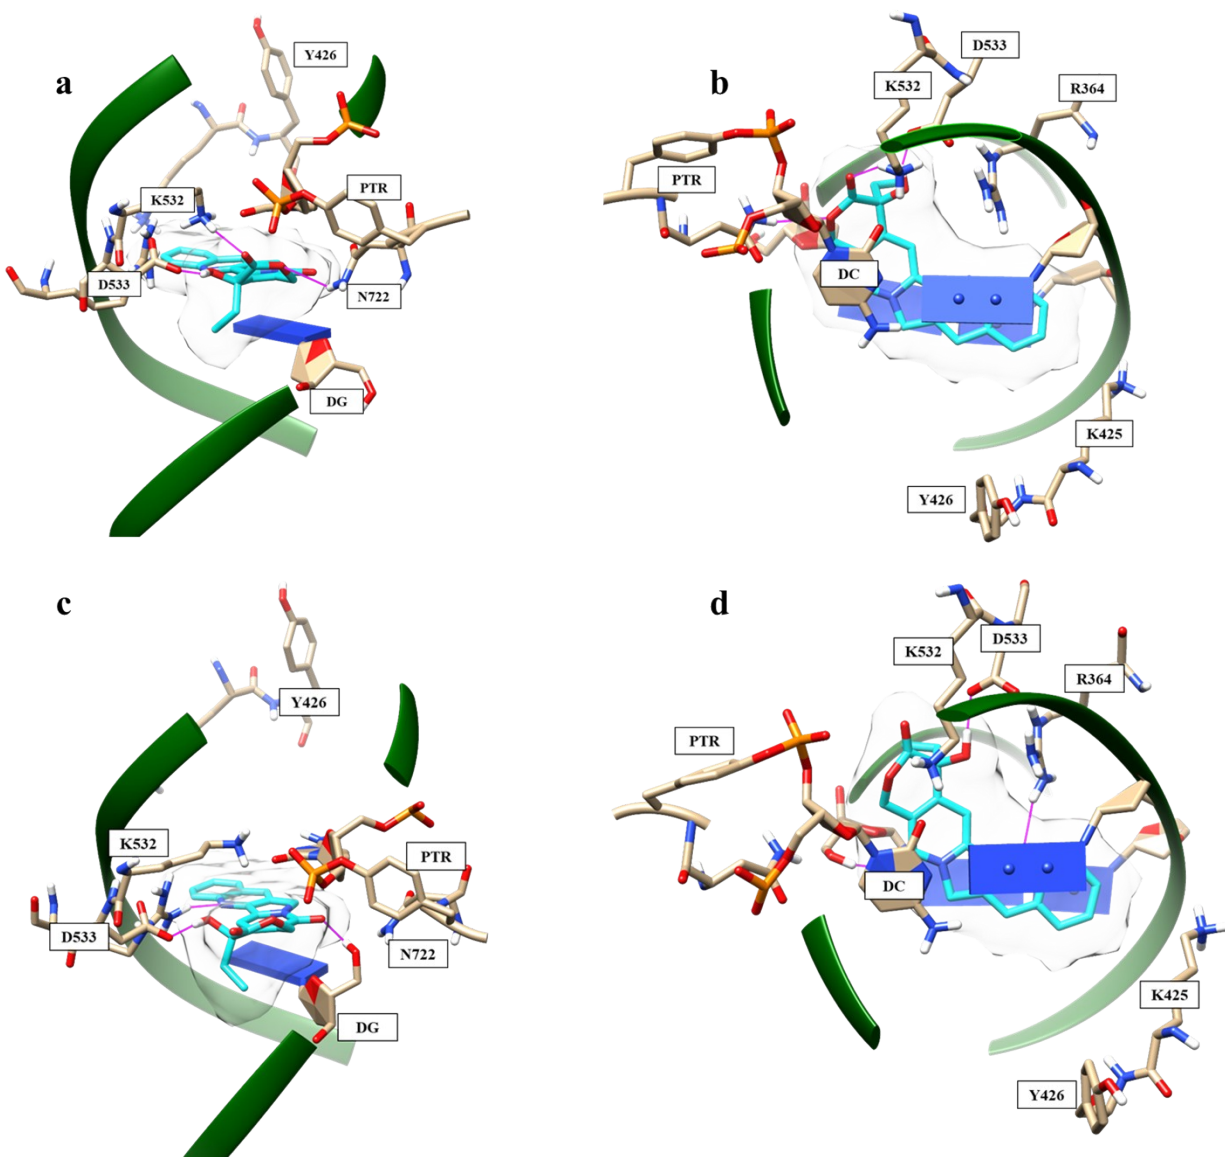

**Figure S10.** Different orientations of CPT were observed in M3 simulations. **a.** The beginning of the simulation side view; **b.** top view; **c.** side view at 300 ns; **d.** top view at 300ns. The DNA backbone is shown in green ribbon. The surrounding residues as well as the stacking DNA bases are shown with stick representation. The CPT compound is shown in cyan.

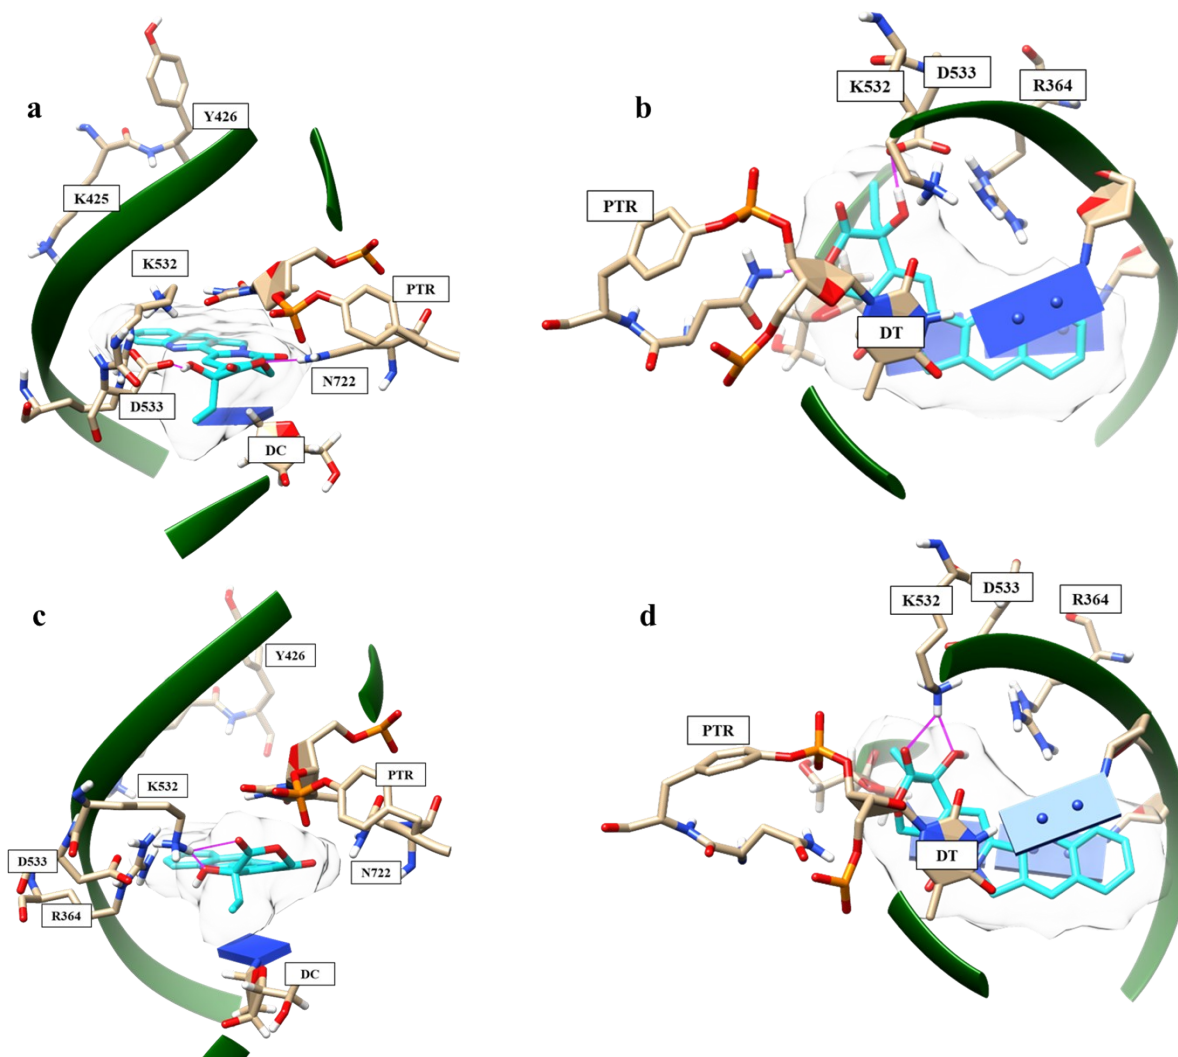

**Figure S11.** Different orientations of CPT were observed in W simulations. **a.** The beginning of the simulation side view; **b.** top view; **c.** side view at 300 ns; **d.** top view at 300ns. The DNA backbone is shown in green ribbon. The surrounding residues as well as the stacking DNA bases are shown with stick representation. The CPT compound is shown in cyan.

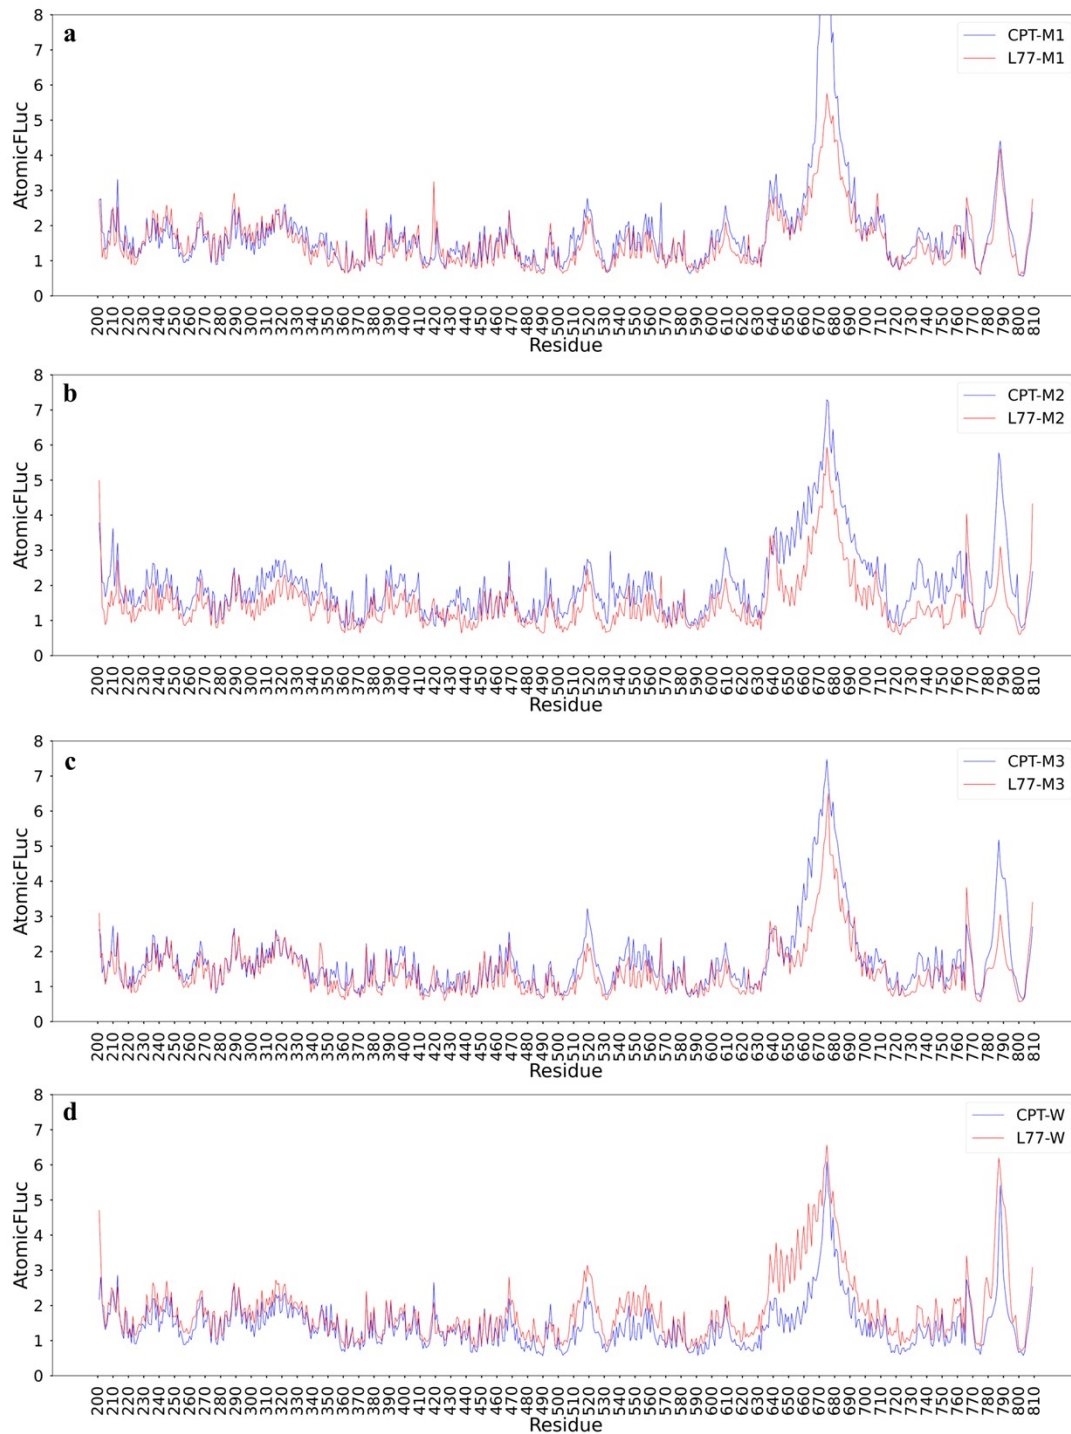

**Figure S12.** The RMSF plots of L77 (red) and CPT (blue) duplicate simulations for **a.** M1, **b.** M2, **c.** M3, and **d.** W simulations. N-terminal domain, core domain, linker domain, and C-terminal domain correspond to residues 1-214 (not shown here), 215-635, 636-712, and 713-765, respectively. The DNA bases start from 766-809, and 810 is the inhibitor compound.

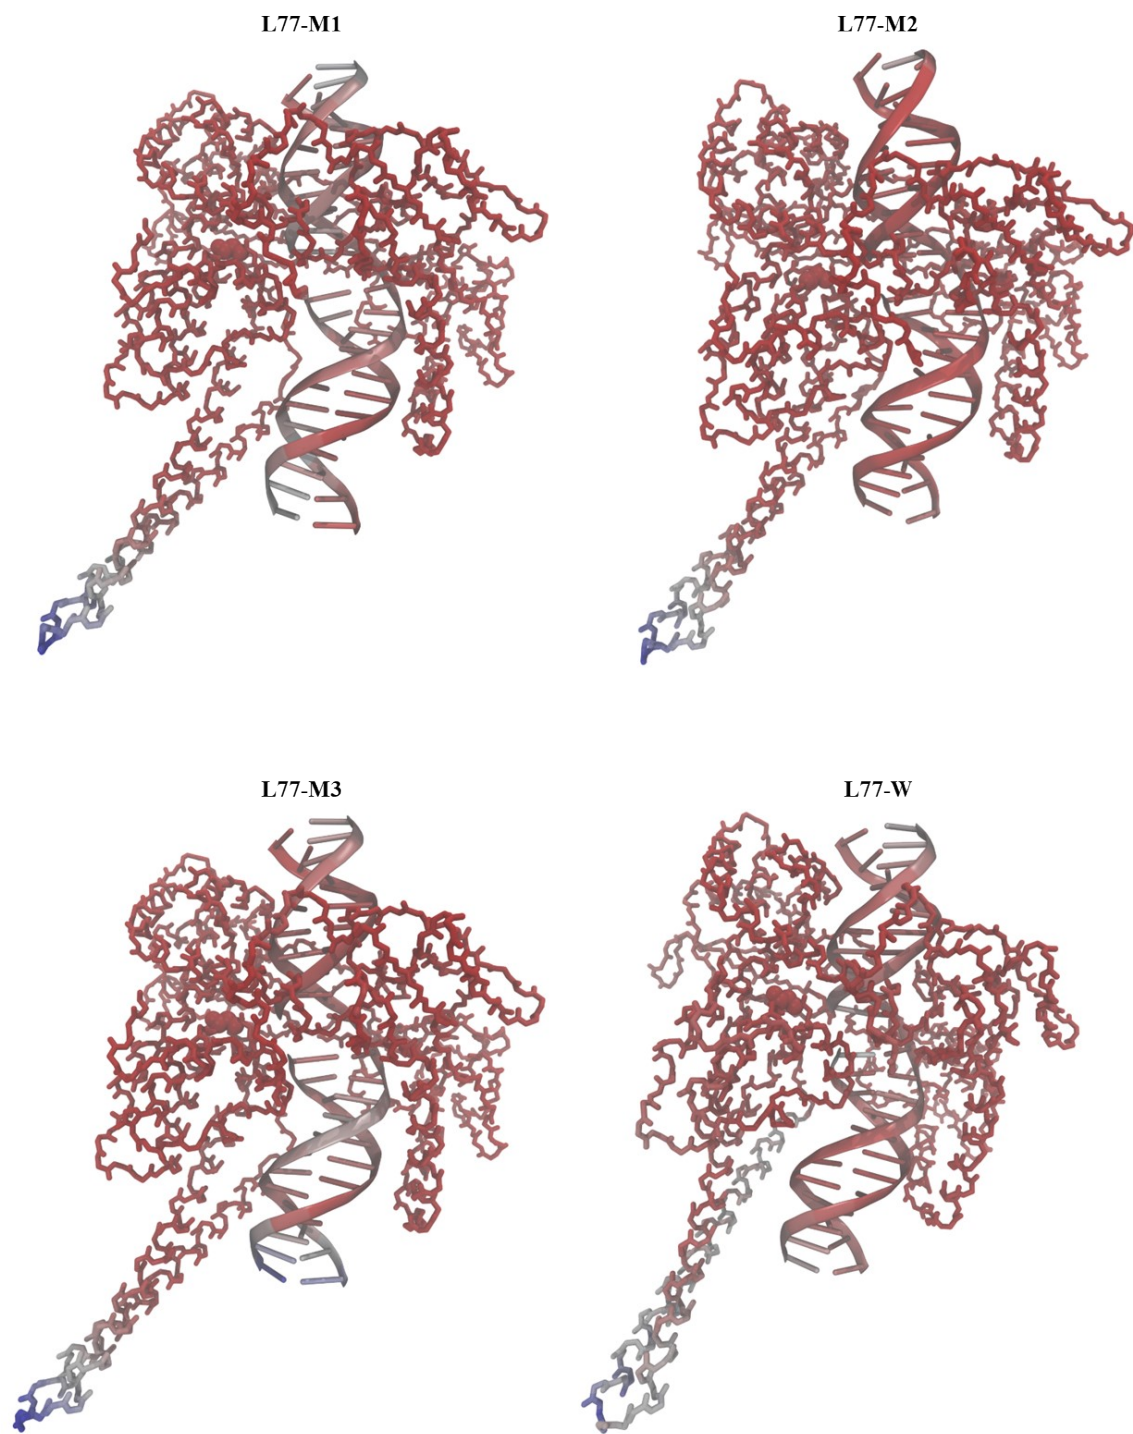

**Figure S13.** The main dynamics obtained from Principal component analysis (PCA) of L77 simulations. The color scale from red to white to blue indicates the low mobility to high mobility.

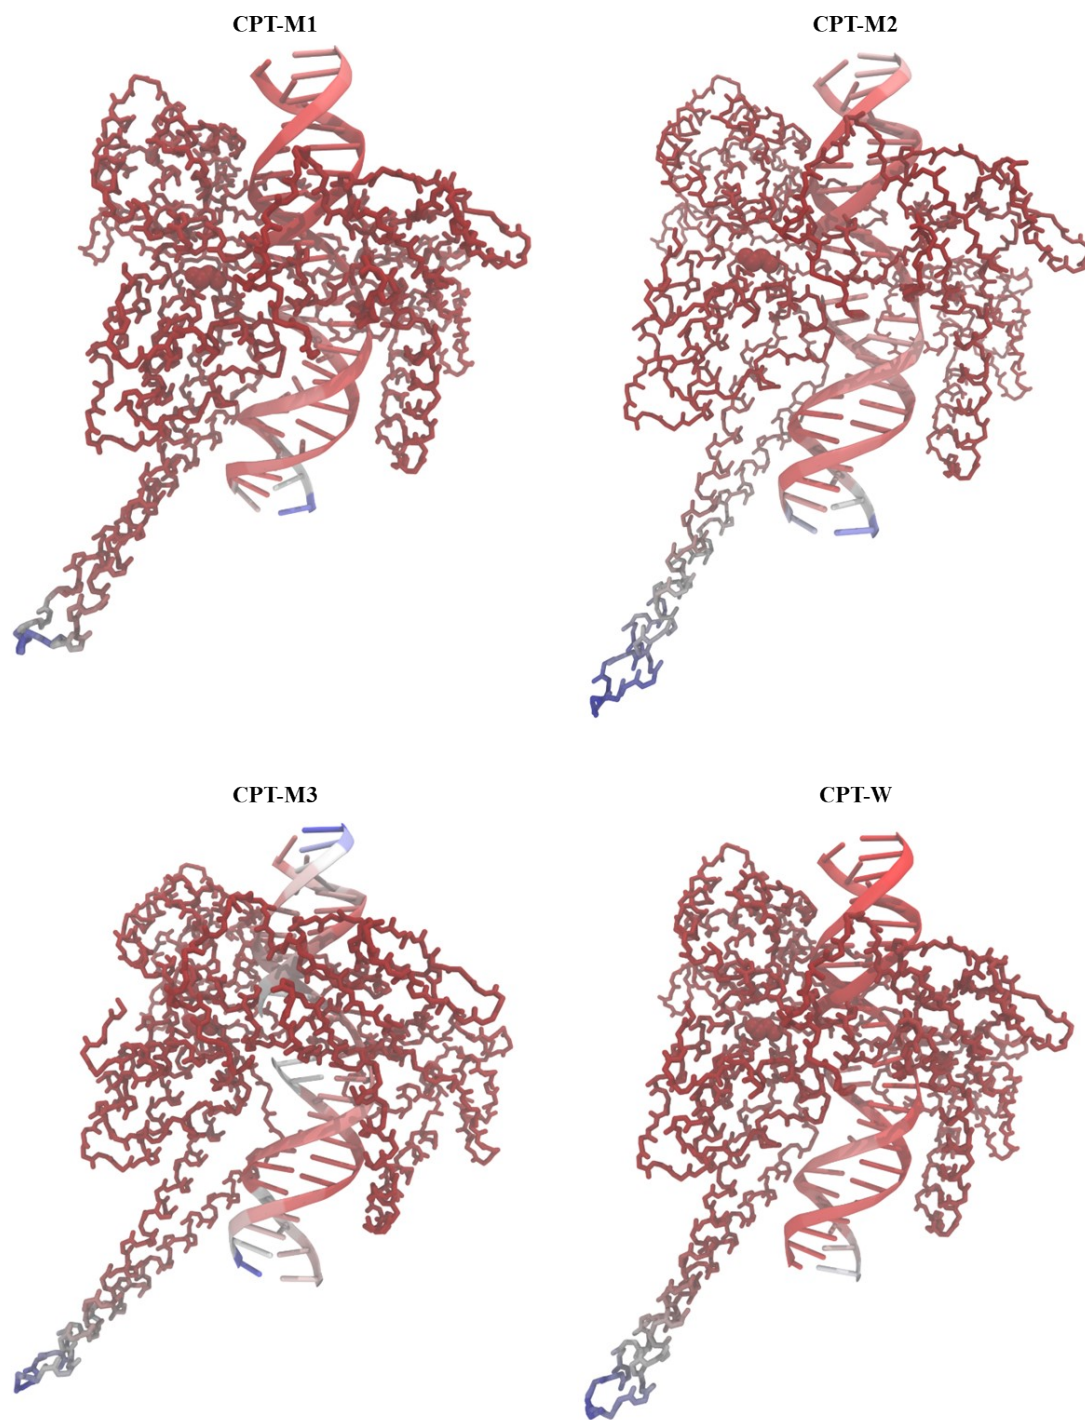

**Figure S14.** The main dynamics obtained from Principal component analysis (PCA) of CPT simulations. The color scale from red to white to blue indicates the low mobility to high mobility.

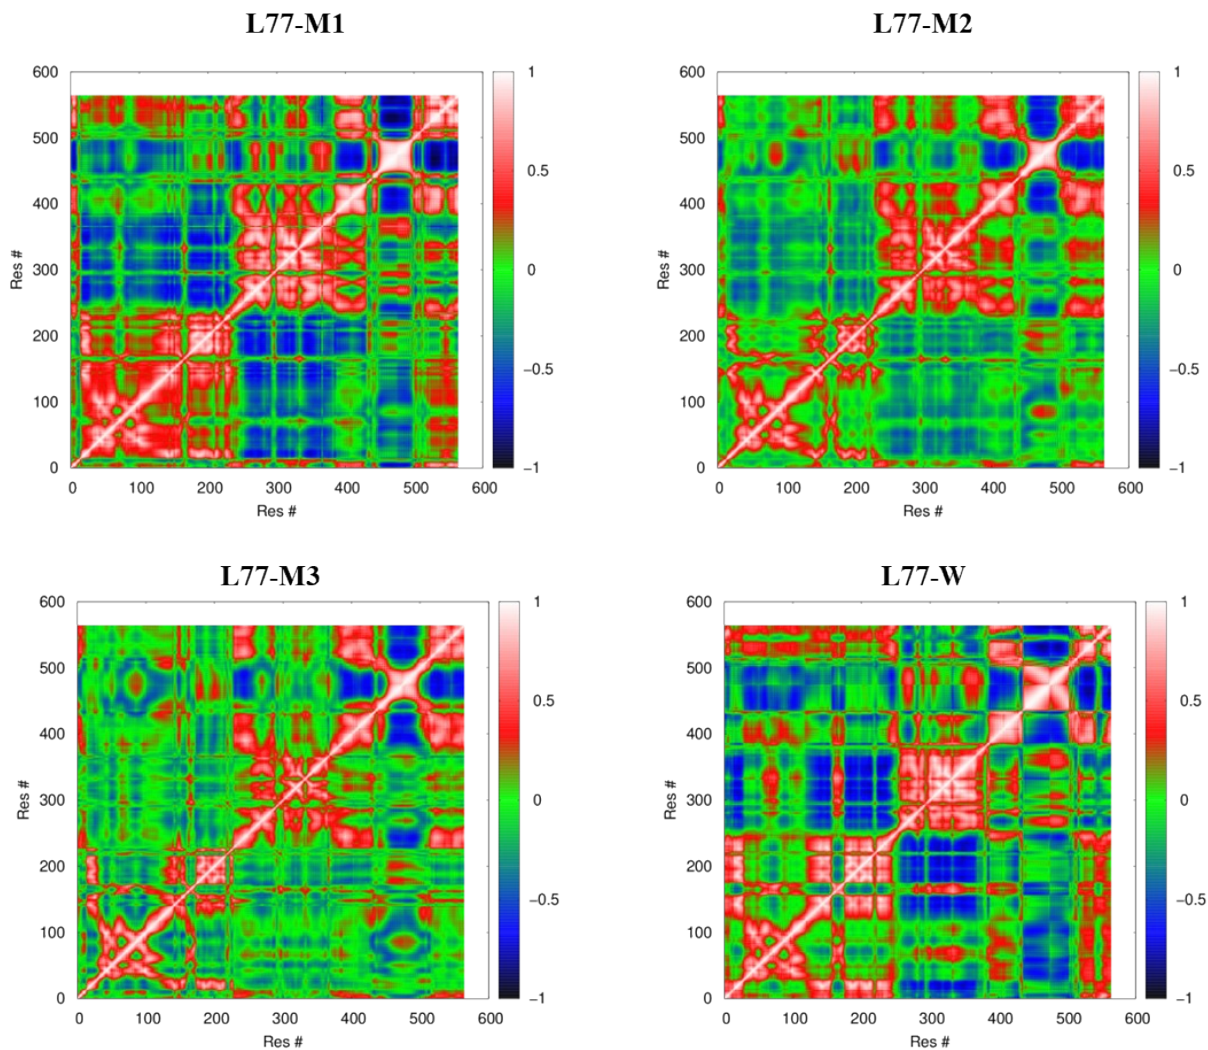

**Figure S15.** The dynamic cross-correlation analysis of L77 simulations. From low correlation to high correlation, the residue pairs are colored from blue to red, respectively.

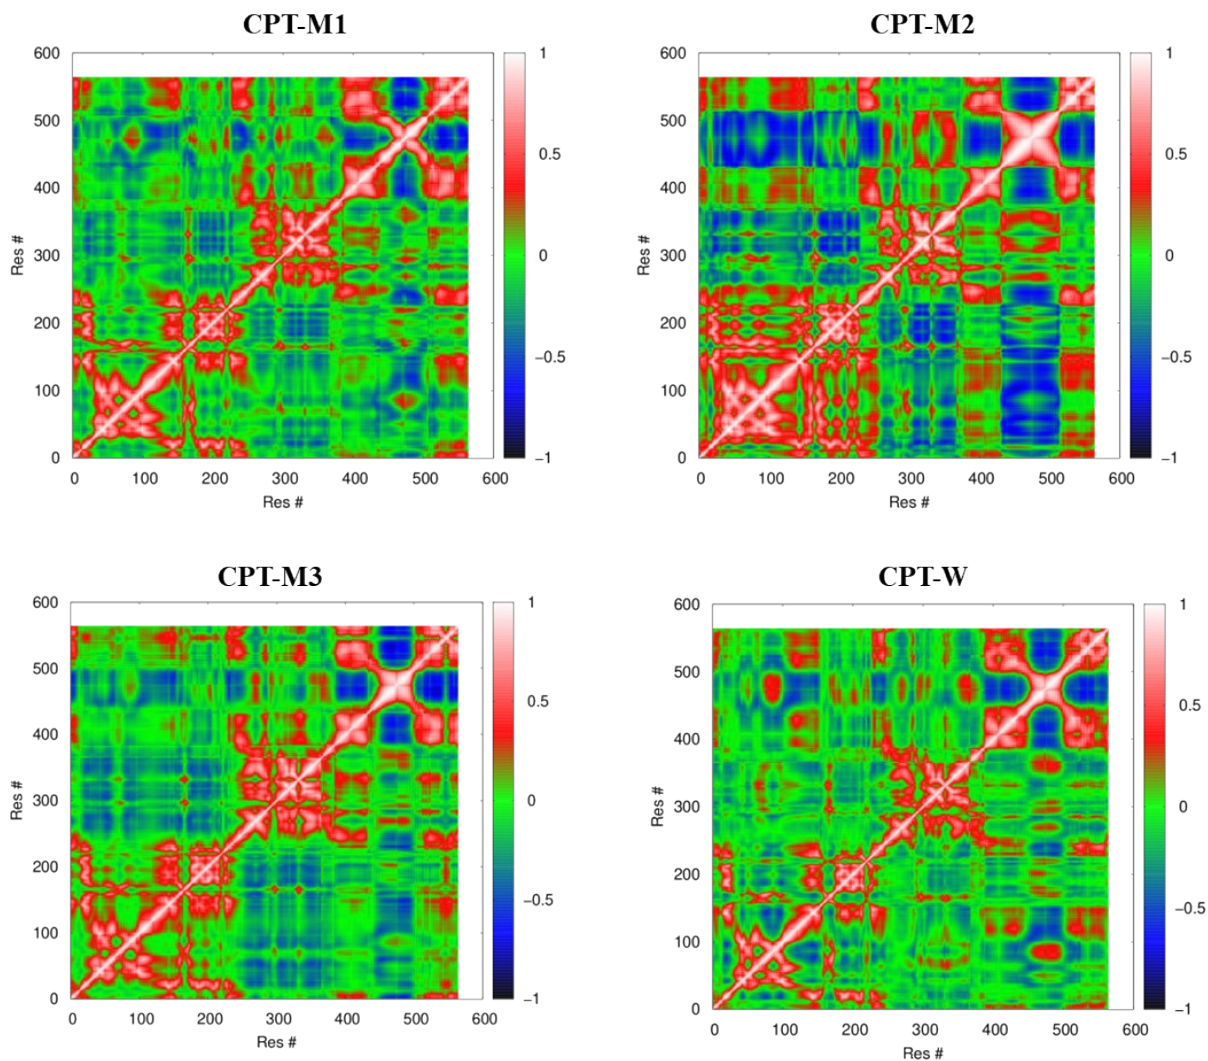

**Figure S16.** Dynamic cross-correlation analysis of CPT simulations. From low correlation to high correlation, the residue pairs are colored from blue to red, respectively.
